# Supplementary material
Source: publisher figshare collection journal article supplement (https://karger.figshare.com/ndownloader/files/27778317)
Supplement: Supplementary file 1 [file 27778317]

Clinical Trials Queries

| **Query** | **Date of retrieval** |
| --- | --- |
| Antibiotic | 21.08.2020 |
| anticoagulant | 21.08.2020 |
| antiviral | 21.08.2020 |
| Remdesivir | 26.08.2020 |
| Tocilizumab | 26.08.2020 |
| Azithromycin | 26.08.2020 |
| Hydroxychloroquine | 26.08.2020 |
| Heparin | 26.08.2020 |

Publications Queries

| **Query** | **Date of retrieval** |
| --- | --- |
| Antithrombotic | 10.09.2020 |
| Dexamethasone | 10.09.2020 |
| Favipiravir | 18.09.2020 |

Suppl. Table 1: Date of queries for drugs and drug categories on different search engines.
